# Supplementary material for: A novel deep UV nonlinear optical crystal Ba3B6O11F2, with a new fundamental building block, B6O14 group
Source: Royal Society of Chemistry journal article supplement (doi:10.1039/c2jm16058g), 2012-01-01
Supplement: c2jm16058g.pdf [file c2jm16058g.pdf]

## Supporting Information

**A Novel Deep UV Nonlinear Optical Crystal  $Ba_3B_6O_{11}F_2$ , with a New Fundamental Building**

**Block  $B_6O_{14}$  Group**

Honwei Yu,<sup>a,b</sup> Hongping Wu,<sup>a</sup> Shilie Pan,<sup>\*a</sup> Zhihua Yang,<sup>a</sup> Xin Su<sup>a</sup> and Fangfang Zhang<sup>a</sup>

<sup>a</sup>*Xinjiang Key Laboratory of Electronic Information Materials and Devices, Xinjiang Technical*

*Institute of Physics & Chemistry, Chinese Academy of Sciences, 40-1 South Beijing Road, Urumqi*

*830011, China*

<sup>b</sup>*Graduate school of Chinese Academy of Sciences, Beijing 100049, China*

\*Corresponding author. E-mail: slpan@ms.xjb.ac.cn. Tel: (86)991-3674558. Fax:

(86)991-3838957

**Table S1.** Selected bond distances (Å) and angles (deg) for Ba<sub>3</sub>B<sub>6</sub>O<sub>11</sub>F<sub>2</sub>.

|                     |            |                     |            |
|---------------------|------------|---------------------|------------|
| Ba(1)-F(2)          | 2.519(4)   | B(1)-O(3)           | 1.489(7)   |
| Ba(1)-F(1)#1        | 2.579(4)   | B(1)-O(9)           | 1.527(7)   |
| Ba(1)-O(10)         | 2.720(4)   | B(2)-O(8)           | 1.361(6)   |
| Ba(1)-O(3)          | 2.748(6)   | B(2)-O(11)          | 1.362(7)   |
| Ba(1)-O(4)          | 2.750(4)   | B(2)-O(2)#11        | 1.373(6)   |
| Ba(1)-O(7)#2        | 2.806(3)   | B(3)-O(9)#12        | 1.357(8)   |
| Ba(1)-O(2)#3        | 2.964(4)   | B(3)-O(4)           | 1.370(7)   |
| Ba(1)-O(11)         | 3.124(4)   | B(3)-O(6)           | 1.380(7)   |
| Ba(1)-O(5)#4        | 3.316(4)   | B(4)-O(10)          | 1.455(6)   |
| Ba(2)-F(1)          | 2.530(5)   | B(4)-O(7)#2         | 1.475(7)   |
| Ba(2)-F(1)#3        | 2.560(5)   | B(4)-O(5)#11        | 1.478(6)   |
| Ba(2)-O(2)          | 2.735(3)   | B(4)-O(4)#10        | 1.523(6)   |
| Ba(2)-O(1)          | 2.750(4)   | B(5)-O(1)           | 1.442(8)   |
| Ba(2)-O(9)#5        | 2.768(4)   | B(5)-O(5)#9         | 1.443(7)   |
| Ba(2)-O(8)          | 2.807(3)   | B(5)-O(2)#6         | 1.507(7)   |
| Ba(2)-O(11)#6       | 2.898(4)   | B(5)-O(6)#8         | 1.514(6)   |
| Ba(2)-O(6)#7        | 2.957(4)   | B(6)-O(3)           | 1.434(7)   |
| Ba(2)-O(3)#5        | 3.101(3)   | B(6)-O(1)           | 1.444(7)   |
| Ba(3)-F(2)          | 2.540(5)   | B(6)-O(11)#7        | 1.518(7)   |
| Ba(3)-F(2)#9        | 2.545(5)   | B(6)-O(8)           | 1.529(7)   |
| Ba(3)-O(5)          | 2.684(3)   | F(2)-Ba(1)-F(1)#1   | 154.8(2)   |
| Ba(3)-O(7)          | 2.718(3)   | F(2)-Ba(1)-O(10)    | 84.89(13)  |
| Ba(3)-O(9)#5        | 2.728(4)   | F(1)#1-Ba(1)-O(10)  | 80.36(12)  |
| Ba(3)-O(1)          | 2.807(4)   | F(2)-Ba(1)-O(3)     | 79.40(13)  |
| Ba(3)-O(5)#9        | 3.119(4)   | F(1)#1-Ba(1)-O(3)   | 75.49(12)  |
| Ba(3)-O(10)#5       | 3.139(3)   | O(10)-Ba(1)-O(3)    | 50.27(10)  |
| Ba(3)-O(6)#10       | 3.145(4)   | F(2)-Ba(1)-O(4)     | 109.08(13) |
| Ba(3)-O(3)          | 3.297(3)   | F(1)#1-Ba(1)-O(4)   | 95.18(13)  |
| Ba(3)-O(4)#10       | 3.324(4)   | O(10)-Ba(1)-O(4)    | 110.38(10) |
| B(1)-O(7)           | 1.447(7)   | O(3)-Ba(1)-O(4)     | 159.19(9)  |
| B(1)-O(10)          | 1.462(7)   | F(2)-Ba(1)-O(7)#2   | 80.01(12)  |
| F(1)#1-Ba(1)-O(7)#2 | 105.53(11) | F(1)#1-Ba(1)-O(5)#4 | 137.09(13) |
| O(10)-Ba(1)-O(7)#2  | 50.91(11)  | O(10)-Ba(1)-O(5)#4  | 125.96(10) |
| O(3)-Ba(1)-O(7)#2   | 99.43(11)  | O(3)-Ba(1)-O(5)#4   | 147.15(8)  |
| O(4)-Ba(1)-O(7)#2   | 64.69(11)  | O(4)-Ba(1)-O(5)#4   | 46.71(9)   |
| F(2)-Ba(1)-O(2)#3   | 87.29(13)  | O(7)#2-Ba(1)-O(5)#4 | 78.10(9)   |
| F(1)#1-Ba(1)-O(2)#3 | 109.21(12) | O(2)#3-Ba(1)-O(5)#4 | 44.41(9)   |
| O(10)-Ba(1)-O(2)#3  | 169.80(11) | O(11)-Ba(1)-O(5)#4  | 101.36(9)  |
| O(3)-Ba(1)-O(2)#3   | 134.29(9)  | F(1)-Ba(2)-F(1)#3   | 153.11(12) |
| O(4)-Ba(1)-O(2)#3   | 66.17(10)  | F(1)-Ba(2)-O(2)     | 102.25(13) |
| O(7)#2-Ba(1)-O(2)#3 | 121.14(11) | F(1)#3-Ba(2)-O(2)   | 73.83(13)  |
| F(2)-Ba(1)-O(11)    | 100.06(11) | F(1)-Ba(2)-O(1)     | 75.67(13)  |
| F(1)#1-Ba(1)-O(11)  | 74.67(11)  | F(1)#3-Ba(2)-O(1)   | 107.81(13) |

---

|                      |            |                       |            |
|----------------------|------------|-----------------------|------------|
| O(10)-Ba(1)-O(11)    | 129.69(12) | O(2)-Ba(2)-O(1)       | 177.87(12) |
| O(3)-Ba(1)-O(11)     | 81.17(10)  | F(1)-Ba(2)-O(9)#5     | 112.40(14) |
| O(4)-Ba(1)-O(11)     | 114.74(11) | F(1)#3-Ba(2)-O(9)#5   | 91.53(13)  |
| O(7)#2-Ba(1)-O(11)   | 179.40(12) | O(2)-Ba(2)-O(9)#5     | 120.36(10) |
| O(2)#3-Ba(1)-O(11)   | 58.28(10)  | O(1)-Ba(2)-O(9)#5     | 61.22(13)  |
| F(2)-Ba(1)-O(5)#4    | 67.86(14)  | F(1)-Ba(2)-O(8)       | 76.82(13)  |
| F(1)#3-Ba(2)-O(8)    | 85.21(12)  | O(7)-Ba(3)-O(1)       | 70.89(11)  |
| O(2)-Ba(2)-O(8)      | 129.09(11) | O(9)#5-Ba(3)-O(1)     | 60.99(13)  |
| O(1)-Ba(2)-O(8)      | 50.24(11)  | F(2)-Ba(3)-O(5)#9     | 137.07(11) |
| O(9)#5-Ba(2)-O(8)    | 105.74(11) | F(2)#9-Ba(3)-O(5)#9   | 68.22(12)  |
| F(1)-Ba(2)-O(11)#6   | 89.75(12)  | O(5)-Ba(3)-O(5)#9     | 146.94(11) |
| F(1)#3-Ba(2)-O(11)#6 | 110.85(12) | O(7)-Ba(3)-O(5)#9     | 49.13(9)   |
| O(2)-Ba(2)-O(11)#6   | 63.50(10)  | O(9)#5-Ba(3)-O(5)#9   | 76.65(11)  |
| O(1)-Ba(2)-O(11)#6   | 116.69(12) | O(1)-Ba(3)-O(5)#9     | 48.19(11)  |
| O(9)#5-Ba(2)-O(11)#6 | 69.55(11)  | F(2)-Ba(3)-O(10)#5    | 78.54(12)  |
| O(8)-Ba(2)-O(11)#6   | 163.02(13) | F(2)#9-Ba(3)-O(10)#5  | 84.44(12)  |
| F(1)-Ba(2)-O(6)#7    | 78.71(14)  | O(5)-Ba(3)-O(10)#5    | 46.73(9)   |
| F(1)#3-Ba(2)-O(6)#7  | 78.91(13)  | O(7)-Ba(3)-O(10)#5    | 171.56(11) |
| O(2)-Ba(2)-O(6)#7    | 49.76(9)   | O(9)#5-Ba(3)-O(10)#5  | 48.14(11)  |
| O(1)-Ba(2)-O(6)#7    | 128.89(10) | O(1)-Ba(3)-O(10)#5    | 100.98(10) |
| O(9)#5-Ba(2)-O(6)#7  | 167.76(11) | O(5)#9-Ba(3)-O(10)#5  | 123.79(10) |
| O(8)-Ba(2)-O(6)#7    | 81.27(10)  | F(2)-Ba(3)-O(6)#10    | 81.04(13)  |
| O(11)#6-Ba(2)-O(6)#7 | 106.54(10) | F(2)#9-Ba(3)-O(6)#10  | 81.56(13)  |
| F(1)-Ba(2)-O(3)#5    | 135.64(14) | O(5)-Ba(3)-O(6)#10    | 47.15(9)   |
| F(1)#3-Ba(2)-O(3)#5  | 69.67(14)  | O(7)-Ba(3)-O(6)#10    | 94.48(10)  |
| O(2)-Ba(2)-O(3)#5    | 73.13(9)   | O(9)#5-Ba(3)-O(6)#10  | 135.30(10) |
| O(1)-Ba(2)-O(3)#5    | 108.65(10) | O(1)-Ba(3)-O(6)#10    | 163.68(9)  |
| O(9)#5-Ba(2)-O(3)#5  | 48.01(10)  | O(5)#9-Ba(3)-O(6)#10  | 126.84(10) |
| O(8)-Ba(2)-O(3)#5    | 140.78(11) | O(10)#5-Ba(3)-O(6)#10 | 93.87(9)   |
| O(11)#6-Ba(2)-O(3)#5 | 47.89(11)  | F(2)-Ba(3)-O(3)       | 69.11(14)  |
| O(6)#7-Ba(2)-O(3)#5  | 120.53(10) | F(2)#9-Ba(3)-O(3)     | 135.94(14) |
| F(2)-Ba(3)-F(2)#9    | 154.68(12) | O(5)-Ba(3)-O(3)       | 144.35(14) |
| F(2)-Ba(3)-O(5)      | 75.81(13)  | O(7)-Ba(3)-O(3)       | 47.74(10)  |
| F(2)#9-Ba(3)-O(5)    | 78.87(14)  | O(9)#5-Ba(3)-O(3)     | 104.80(10) |
| F(2)-Ba(3)-O(7)      | 104.01(12) | O(1)-Ba(3)-O(3)       | 45.84(10)  |
| F(2)#9-Ba(3)-O(7)    | 95.56(12)  | O(5)#9-Ba(3)-O(3)     | 68.63(11)  |
| O(5)-Ba(3)-O(7)      | 141.57(10) | O(10)#5-Ba(3)-O(3)    | 128.00(10) |
| F(2)-Ba(3)-O(9)#5    | 107.44(13) | O(6)#10-Ba(3)-O(3)    | 118.79(9)  |
| F(2)#9-Ba(3)-O(9)#5  | 73.31(13)  | F(2)-Ba(3)-O(4)#10    | 72.85(12)  |
| O(5)-Ba(3)-O(9)#5    | 91.34(11)  | F(2)#9-Ba(3)-O(4)#10  | 105.48(12) |
| O(7)-Ba(3)-O(9)#5    | 123.78(12) | O(5)-Ba(3)-O(4)#10    | 86.66(9)   |
| F(2)-Ba(3)-O(1)      | 95.23(13)  | O(7)-Ba(3)-O(4)#10    | 57.91(10)  |
| F(2)#9-Ba(3)-O(1)    | 106.40(13) | O(9)#5-Ba(3)-O(4)#10  | 177.85(11) |
| O(5)-Ba(3)-O(1)      | 147.35(10) | O(1)-Ba(3)-O(4)#10    | 121.16(9)  |

---

---

|                       |            |                      |          |
|-----------------------|------------|----------------------|----------|
| O(5)#9-Ba(3)-O(4)#10  | 104.64(9)  | O(10)-B(4)-O(5)#11   | 106.3(4) |
| O(10)#5-Ba(3)-O(4)#10 | 130.24(11) | O(7)#2-B(4)-O(5)#11  | 112.4(4) |
| O(6)#10-Ba(3)-O(4)#10 | 42.54(8)   | O(10)-B(4)-O(4)#10   | 110.9(4) |
| O(3)-Ba(3)-O(4)#10    | 77.32(8)   | O(7)#2-B(4)-O(4)#10  | 108.6(4) |
| B(3)#10-Ba(3)-O(4)#10 | 23.84(11)  | O(5)#11-B(4)-O(4)#10 | 110.1(4) |
| O(7)-B(1)-O(10)       | 113.6(5)   | O(1)-B(5)-O(5)#9     | 115.2(5) |
| O(7)-B(1)-O(3)        | 116.1(4)   | O(1)-B(5)-O(2)#6     | 110.6(4) |
| O(10)-B(1)-O(3)       | 103.8(4)   | O(5)#9-B(5)-O(2)#6   | 108.5(4) |
| O(7)-B(1)-O(9)        | 108.7(5)   | O(1)-B(5)-O(6)#8     | 110.1(4) |
| O(10)-B(1)-O(9)       | 108.3(4)   | O(5)#9-B(5)-O(6)#8   | 106.5(4) |
| O(3)-B(1)-O(9)        | 105.9(4)   | O(2)#6-B(5)-O(6)#8   | 105.4(4) |
| O(8)-B(2)-O(11)       | 120.0(4)   | O(3)-B(6)-O(1)       | 114.5(5) |
| O(8)-B(2)-O(2)#11     | 118.6(5)   | O(3)-B(6)-O(11)#7    | 111.6(4) |
| O(11)-B(2)-O(2)#11    | 121.5(4)   | O(1)-B(6)-O(11)#7    | 110.8(5) |
| O(9)#12-B(3)-O(4)     | 121.7(5)   | O(3)-B(6)-O(8)       | 106.3(5) |
| O(9)#12-B(3)-O(6)     | 120.6(5)   | O(1)-B(6)-O(8)       | 105.1(4) |
| O(4)-B(3)-O(6)        | 117.7(5)   | O(11)#7-B(6)-O(8)    | 108.1(4) |
| O(10)-B(4)-O(7)#2     | 108.5(4)   |                      |          |

---

Note. Symmetry transformations used to generate equivalent atoms:

#1  $-x+1, y+1/2, -z+2$ ; #2  $-x+1, y+1/2, -z+1$ ; #3  $-x, y+1/2, -z+2$ ; #4  $-x, y+1/2, -z+1$ ; #5  $x-1, y, z$ ;  
#6  $-x, y-1/2, -z+2$ ; #7  $-x+1, y-1/2, -z+2$ ; #8  $x-1, y-1, z$ ; #9  $-x, y-1/2, -z+1$ ; #10  $-x+1, y-1/2, -z+1$ ;  
#11  $x+1, y, z$ ; #12  $x, y+1, z$ ; #13  $x+1, y+1, z$ ; #14  $x, y-1, z$

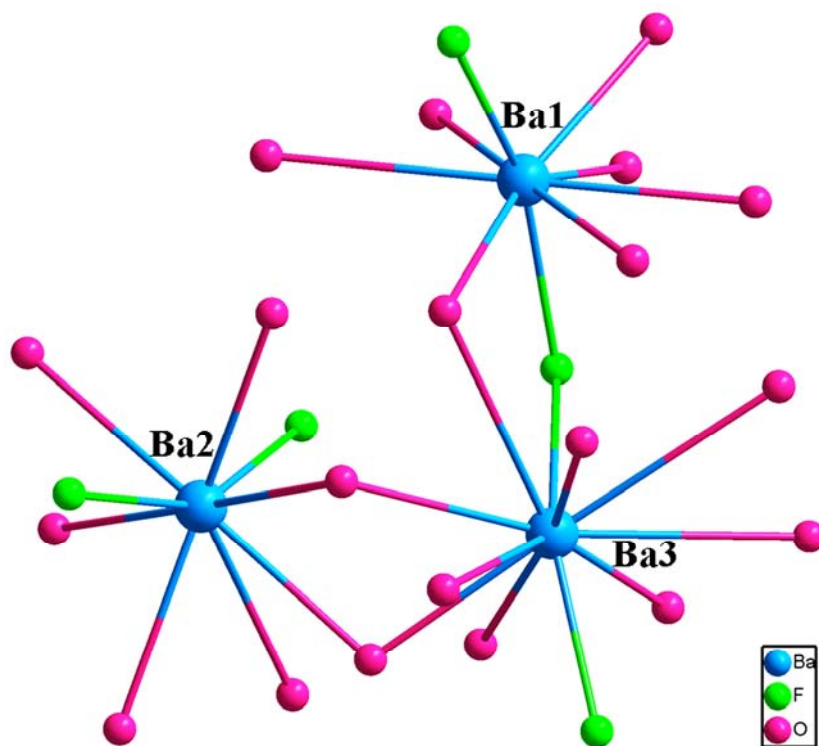

**Figure S1.** Barium-coordinated environments.

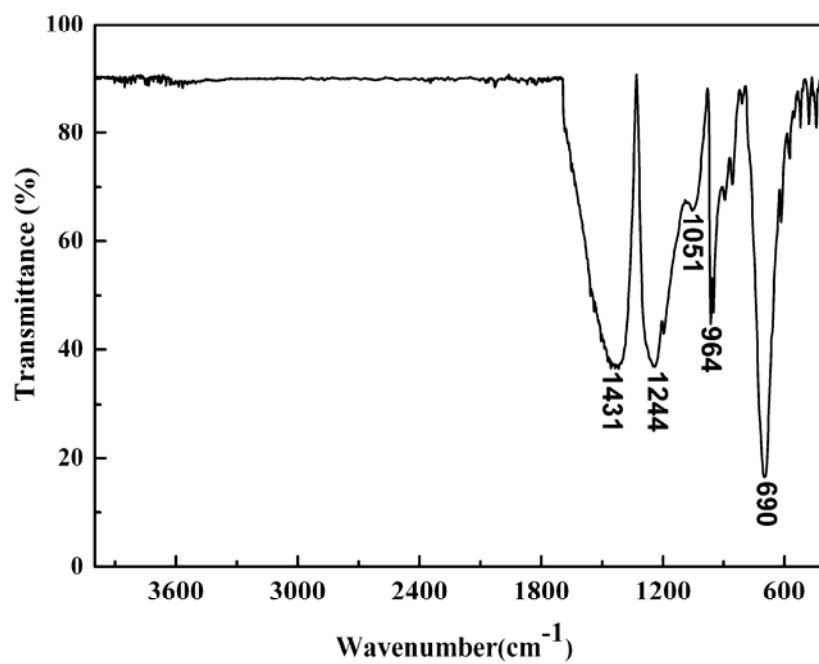

**Figure S2.** The IR spectrum of Ba<sub>3</sub>B<sub>6</sub>O<sub>11</sub>F<sub>2</sub>.
